# Supplementary material for: Key residues in TLR4-MD2 tetramer formation identified by free energy simulations
Source: PubMed Central journal article supplement (PMC6812856; doi:10.1371/journal.pcbi.1007228), 2019-10-14
Supplement: pcbi.1007228.s011.pdf [file pcbi.1007228.s011.pdf]

**Table S1.** The  $C_{\alpha}$  root mean-square deviation (RMSD) of ligand-free TLR4-MD2 heterodimer, (TLR4-MD2)<sub>2</sub> tetramer, lipopolysaccharide (LPS)-bound (TLR4-MD2)<sub>2</sub> tetramer, and neoseptin3-bound (TLR4-MD2)<sub>2</sub> tetramer complexes are averaged over the last 1.0  $\mu$ s of each trajectory. Trajectories in each complex are identified with a number from 1 to 4 (#) and their average is denoted by '1-4' as shaded in light grey. The values in parenthesis are standard deviation.

| <b>Complex</b>                     | <b>#</b> | <b>RMSD</b>        |
|------------------------------------|----------|--------------------|
| (TLR4-MD2)                         | 1        | <b>3.82</b> (0.95) |
| (TLR4-MD2)                         | 2        | <b>2.81</b> (0.53) |
| (TLR4-MD2)                         | 3        | <b>3.40</b> (0.54) |
| (TLR4-MD2)                         | 4        | <b>4.05</b> (0.62) |
| (TLR4-MD2)                         | 1-4      | <b>3.52</b> (0.55) |
| (TLR4-MD2) <sub>2</sub>            | 1        | <b>4.33</b> (0.46) |
| (TLR4-MD2) <sub>2</sub>            | 2        | <b>3.07</b> (0.32) |
| (TLR4-MD2) <sub>2</sub>            | 3        | <b>4.24</b> (0.83) |
| (TLR4-MD2) <sub>2</sub>            | 4        | <b>4.10</b> (0.46) |
| (TLR4-MD2) <sub>2</sub>            | 1-4      | <b>3.93</b> (0.58) |
| (TLR4-MD2-LPS) <sub>2</sub>        | 1        | <b>2.44</b> (0.36) |
| (TLR4-MD2-LPS) <sub>2</sub>        | 2        | <b>2.69</b> (0.38) |
| (TLR4-MD2-LPS) <sub>2</sub>        | 3        | <b>2.68</b> (0.49) |
| (TLR4-MD2-LPS) <sub>2</sub>        | 4        | <b>2.25</b> (0.28) |
| (TLR4-MD2-LPS) <sub>2</sub>        | 1-4      | <b>2.51</b> (0.21) |
| (TLR4-MD2-neoseptin3) <sub>2</sub> | 1        | <b>2.86</b> (0.40) |
| (TLR4-MD2-neoseptin3) <sub>2</sub> | 2        | <b>3.13</b> (0.28) |
| (TLR4-MD2-neoseptin3) <sub>2</sub> | 3        | <b>2.87</b> (0.39) |
| (TLR4-MD2-neoseptin3) <sub>2</sub> | 4        | <b>2.88</b> (0.42) |
| (TLR4-MD2-neoseptin3) <sub>2</sub> | 1-4      | <b>2.93</b> (0.13) |
