# Supplementary material for: Key residues in TLR4-MD2 tetramer formation identified by free energy simulations
Source: PubMed Central journal article supplement (PMC6812856; doi:10.1371/journal.pcbi.1007228), 2019-10-14
Supplement: pcbi.1007228.s012.pdf [file pcbi.1007228.s012.pdf]

**Table S2. The binding free energies ( $\Delta G$ ) in kcal/mol computed by both molecular mechanics generalized Born surface area (MM-GBSA) and molecular mechanics Poisson-Boltzmann surface area (MM-PBSA) methods at TLR4/MD2 interface.** The free energies in each trajectory of the ligand-free TLR4-MD2 heterodimer, (TLR4-MD2)<sub>2</sub> tetramer, lipopolysaccharide (LPS)-bound (TLR4-MD2)<sub>2</sub> tetramer, and neoseptin3-bound (TLR4-MD2)<sub>2</sub> tetramer complexes are averaged over the 1000 frames from the last 1.0  $\mu$ s of that trajectory with an interval of 1.0 ns. Trajectories in each complex are identified with a number from 1 to 4 (#) and their average is denoted by '1-4' as shaded in light grey. A negative value is a favorable free energy, while a positive value is an unfavorable. The values in parenthesis are standard deviation.  $\Delta E_{MM}$  is molecular mechanics free energy which is divided into  $\Delta E_{ele}$  and  $\Delta E_{vdw}$  representing the contributions from the electrostatic and van der Waals interactions, respectively.  $\Delta G_{sol}$  is solvation free energy expressed by  $\Delta G_{pol}$  and  $\Delta G_{nonpol}$ , the polar and non-polar contributions, respectively.

| Complex                     | #   | Generalized Born (GB)     |                           |                          |                         | Poisson-Boltzmann (PB)    |                          |                         |                           |
|-----------------------------|-----|---------------------------|---------------------------|--------------------------|-------------------------|---------------------------|--------------------------|-------------------------|---------------------------|
|                             |     | $\Delta E_{MM}$           |                           | $\Delta G_{sol}$         |                         | $\Delta G$                | $\Delta G_{sol}$         |                         | $\Delta G$                |
|                             |     | $\Delta E_{ele}$          | $\Delta E_{vdw}$          | $\Delta G_{pol}$         | $\Delta G_{nonpol}$     |                           | $\Delta G_{pol}$         | $\Delta G_{nonpol}$     |                           |
| (TLR4-MD2)                  | 1   | <b>-572.05</b><br>(95.42) | <b>-120.39</b><br>(19.61) | <b>596.19</b><br>(91.54) | <b>-18.94</b><br>(3.00) | <b>-115.18</b><br>(23.28) | <b>581.69</b><br>(89.98) | <b>-13.99</b><br>(2.19) | <b>-124.72</b><br>(24.91) |
| (TLR4-MD2)                  | 2   | <b>-598.90</b><br>(69.11) | <b>-133.64</b><br>(20.06) | <b>630.65</b><br>(69.34) | <b>-21.43</b><br>(2.85) | <b>-123.30</b><br>(18.13) | <b>619.65</b><br>(67.95) | <b>-15.90</b><br>(2.19) | <b>-128.77</b><br>(21.54) |
| (TLR4-MD2)                  | 3   | <b>-627.92</b><br>(81.63) | <b>-133.93</b><br>(19.24) | <b>659.51</b><br>(78.25) | <b>-21.39</b><br>(2.72) | <b>-123.70</b><br>(17.54) | <b>653.30</b><br>(75.74) | <b>-15.53</b><br>(2.07) | <b>-124.05</b><br>(24.31) |
| (TLR4-MD2)                  | 4   | <b>-621.46</b><br>(72.95) | <b>-121.36</b><br>(16.72) | <b>659.01</b><br>(70.49) | <b>-18.94</b><br>(2.26) | <b>-102.73</b><br>(16.11) | <b>636.84</b><br>(70.64) | <b>-14.53</b><br>(1.63) | <b>-120.49</b><br>(17.24) |
| (TLR4-MD2)                  | 1-4 | <b>-605.08</b><br>(25.29) | <b>-127.33</b><br>(7.47)  | <b>636.34</b><br>(29.97) | <b>-20.18</b><br>(1.43) | <b>-116.23</b><br>(9.82)  | <b>622.87</b><br>(30.70) | <b>-14.99</b><br>(0.88) | <b>-124.51</b><br>(3.39)  |
| (TLR4-MD2) <sub>2</sub>     | 1   | <b>-570.87</b><br>(61.76) | <b>-105.06</b><br>(7.92)  | <b>585.02</b><br>(56.18) | <b>-17.06</b><br>(1.16) | <b>-107.94</b><br>(13.48) | <b>573.90</b><br>(56.03) | <b>-12.14</b><br>(0.67) | <b>-114.16</b><br>(13.64) |
| (TLR4-MD2) <sub>2</sub>     | 2   | <b>-603.81</b><br>(49.14) | <b>-104.56</b><br>(7.44)  | <b>614.77</b><br>(46.09) | <b>-16.99</b><br>(0.80) | <b>-110.56</b><br>(9.92)  | <b>611.77</b><br>(45.86) | <b>-11.99</b><br>(0.50) | <b>-108.57</b><br>(14.24) |
| (TLR4-MD2) <sub>2</sub>     | 3   | <b>-603.33</b><br>(52.31) | <b>-104.74</b><br>(7.32)  | <b>616.09</b><br>(47.24) | <b>-17.00</b><br>(0.80) | <b>-108.97</b><br>(10.97) | <b>606.66</b><br>(48.18) | <b>-11.86</b><br>(0.47) | <b>-113.26</b><br>(14.01) |
| (TLR4-MD2) <sub>2</sub>     | 4   | <b>-528.91</b><br>(53.16) | <b>-98.78</b><br>(7.00)   | <b>557.60</b><br>(48.32) | <b>-15.57</b><br>(0.86) | <b>-85.65</b><br>(10.09)  | <b>538.99</b><br>(48.41) | <b>-11.57</b><br>(0.56) | <b>-100.25</b><br>(11.62) |
| (TLR4-MD2) <sub>2</sub>     | 1-4 | <b>-576.73</b><br>(35.41) | <b>-103.29</b><br>(3.01)  | <b>593.37</b><br>(27.83) | <b>-16.66</b><br>(0.72) | <b>-103.28</b><br>(11.80) | <b>582.83</b><br>(33.70) | <b>-11.89</b><br>(0.24) | <b>-109.06</b><br>(6.36)  |
| (TLR4-MD2-LPS) <sub>2</sub> | 1   | <b>-583.45</b><br>(60.07) | <b>-115.06</b><br>(7.63)  | <b>613.32</b><br>(54.60) | <b>-18.37</b><br>(0.86) | <b>-103.55</b><br>(12.97) | <b>605.31</b><br>(56.37) | <b>-13.05</b><br>(0.61) | <b>-106.23</b><br>(17.36) |
| (TLR4-MD2-LPS) <sub>2</sub> | 2   | <b>-567.83</b><br>(52.53) | <b>-113.85</b><br>(8.15)  | <b>597.25</b><br>(48.96) | <b>-18.11</b><br>(0.98) | <b>-102.52</b><br>(13.25) | <b>585.46</b><br>(49.95) | <b>-12.95</b><br>(0.59) | <b>-109.16</b><br>(12.96) |
| (TLR4-MD2-LPS) <sub>2</sub> | 3   | <b>-569.64</b><br>(50.69) | <b>-114.58</b><br>(7.86)  | <b>601.61</b><br>(46.93) | <b>-18.31</b><br>(1.02) | <b>-100.91</b><br>(10.51) | <b>590.64</b><br>(47.36) | <b>-13.10</b><br>(0.55) | <b>-106.68</b><br>(11.89) |
| (TLR4-MD2-LPS) <sub>2</sub> | 4   | <b>-606.82</b><br>(55.32) | <b>-120.51</b><br>(7.71)  | <b>628.82</b><br>(51.76) | <b>-19.46</b><br>(0.79) | <b>-117.94</b><br>(11.82) | <b>622.40</b><br>(51.41) | <b>-13.63</b><br>(0.42) | <b>-118.54</b><br>(14.02) |
| (TLR4-MD2-LPS) <sub>2</sub> | 1-4 | <b>-581.94</b><br>(18.00) | <b>-116.00</b><br>(3.05)  | <b>610.25</b><br>(14.12) | <b>-18.56</b><br>(0.61) | <b>-106.23</b><br>(7.88)  | <b>600.95</b><br>(16.59) | <b>-13.18</b><br>(0.30) | <b>-110.15</b><br>(5.74)  |

|                                    |     |                           |                          |                          |                         |                           |                          |                         |                           |
|------------------------------------|-----|---------------------------|--------------------------|--------------------------|-------------------------|---------------------------|--------------------------|-------------------------|---------------------------|
| (TLR4-MD2-neoseptin3) <sub>2</sub> | 1   | <b>-464.97</b><br>(48.56) | <b>-112.56</b><br>(6.99) | <b>487.82</b><br>(41.54) | <b>-17.09</b><br>(0.86) | <b>-106.78</b><br>(14.69) | <b>475.44</b><br>(42.41) | <b>-11.74</b><br>(0.51) | <b>-113.81</b><br>(16.58) |
| (TLR4-MD2-neoseptin3) <sub>2</sub> | 2   | <b>-482.94</b><br>(45.91) | <b>-105.82</b><br>(6.93) | <b>507.38</b><br>(42.09) | <b>-16.75</b><br>(0.70) | <b>-98.12</b><br>(9.33)   | <b>493.49</b><br>(41.75) | <b>-11.65</b><br>(0.39) | <b>-106.90</b><br>(11.51) |
| (TLR4-MD2-neoseptin3) <sub>2</sub> | 3   | <b>-522.16</b><br>(48.58) | <b>-107.03</b><br>(7.04) | <b>546.06</b><br>(45.23) | <b>-16.82</b><br>(0.73) | <b>-99.94</b><br>(9.63)   | <b>531.81</b><br>(44.82) | <b>-11.77</b><br>(0.49) | <b>-109.14</b><br>(12.53) |
| (TLR4-MD2-neoseptin3) <sub>2</sub> | 4   | <b>-458.30</b><br>(51.86) | <b>-107.49</b><br>(6.97) | <b>481.73</b><br>(44.78) | <b>-16.50</b><br>(0.68) | <b>-100.54</b><br>(13.12) | <b>464.92</b><br>(43.94) | <b>-11.57</b><br>(0.38) | <b>-112.42</b><br>(16.61) |
| (TLR4-MD2-neoseptin3) <sub>2</sub> | 1-4 | <b>-482.09</b><br>(28.67) | <b>-108.23</b><br>(2.97) | <b>505.75</b><br>(29.02) | <b>-16.79</b><br>(0.24) | <b>-101.35</b><br>(3.77)  | <b>491.42</b><br>(29.40) | <b>-11.68</b><br>(0.09) | <b>-110.57</b><br>(3.13)  |
