# Supplementary material for: Key residues in TLR4-MD2 tetramer formation identified by free energy simulations
Source: PubMed Central journal article supplement (PMC6812856; doi:10.1371/journal.pcbi.1007228), 2019-10-14
Supplement: pcbi.1007228.s013.pdf [file pcbi.1007228.s013.pdf]

**Table S3.** The binding free energies ( $\Delta G$ ) in kcal/mol computed by both molecular mechanics generalized Born surface area (MM-GBSA) and molecular mechanics Poisson-Boltzmann surface area (MM-PBSA) methods at TLR4\*/MD2\* interface.

| Complex                            | #   | $\Delta E_{MM}$           |                          | Generalized Born (GB)    |                         |                           | Poisson-Boltzmann (PB)   |                         |                           |
|------------------------------------|-----|---------------------------|--------------------------|--------------------------|-------------------------|---------------------------|--------------------------|-------------------------|---------------------------|
|                                    |     | $\Delta E_{ele}$          | $\Delta E_{vdw}$         | $\Delta G_{sol}$         |                         | $\Delta G$                | $\Delta G_{sol}$         |                         | $\Delta G$                |
|                                    |     |                           |                          | $\Delta G_{pol}$         | $\Delta G_{nonpol}$     |                           | $\Delta G_{pol}$         | $\Delta G_{nonpol}$     |                           |
| (TLR4-MD2) <sub>2</sub>            | 1   | <b>-401.86</b><br>(49.13) | <b>-96.31</b><br>(6.34)  | <b>433.13</b><br>(45.34) | <b>-14.79</b><br>(0.77) | <b>-79.82</b><br>(9.34)   | <b>415.09</b><br>(44.74) | <b>-11.18</b><br>(0.47) | <b>-94.25</b><br>(10.69)  |
| (TLR4-MD2) <sub>2</sub>            | 2   | <b>-415.29</b><br>(72.99) | <b>-105.82</b><br>(7.04) | <b>450.54</b><br>(65.60) | <b>-16.07</b><br>(0.82) | <b>-86.63</b><br>(11.26)  | <b>437.15</b><br>(67.02) | <b>-11.75</b><br>(0.58) | <b>-95.69</b><br>(12.47)  |
| (TLR4-MD2) <sub>2</sub>            | 3   | <b>-470.44</b><br>(52.58) | <b>-104.50</b><br>(6.58) | <b>492.72</b><br>(48.24) | <b>-16.83</b><br>(0.59) | <b>-99.03</b><br>(10.67)  | <b>481.87</b><br>(47.50) | <b>-12.04</b><br>(0.40) | <b>-105.08</b><br>(11.19) |
| (TLR4-MD2) <sub>2</sub>            | 4   | <b>-492.07</b><br>(66.78) | <b>-95.80</b><br>(6.99)  | <b>517.40</b><br>(62.20) | <b>-15.27</b><br>(0.90) | <b>-85.73</b><br>(10.09)  | <b>500.28</b><br>(61.22) | <b>-11.52</b><br>(0.63) | <b>-99.10</b><br>(12.00)  |
| (TLR4-MD2) <sub>2</sub>            | 1-4 | <b>-444.92</b><br>(43.23) | <b>-100.61</b><br>(5.29) | <b>473.45</b><br>(38.53) | <b>-15.74</b><br>(0.90) | <b>-87.80</b><br>(8.07)   | <b>458.60</b><br>(39.29) | <b>-11.62</b><br>(0.36) | <b>-98.53</b><br>(4.82)   |
| (TLR4-MD2-LPS) <sub>2</sub>        | 1   | <b>-567.11</b><br>(48.40) | <b>-116.14</b><br>(7.22) | <b>592.14</b><br>(43.89) | <b>-18.54</b><br>(0.70) | <b>-109.63</b><br>(10.42) | <b>583.25</b><br>(44.25) | <b>-12.73</b><br>(0.42) | <b>-112.71</b><br>(11.60) |
| (TLR4-MD2-LPS) <sub>2</sub>        | 2   | <b>-547.10</b><br>(53.04) | <b>-120.28</b><br>(7.77) | <b>580.17</b><br>(47.45) | <b>-18.72</b><br>(0.97) | <b>-105.92</b><br>(12.65) | <b>567.11</b><br>(46.63) | <b>-13.11</b><br>(0.74) | <b>-113.36</b><br>(15.97) |
| (TLR4-MD2-LPS) <sub>2</sub>        | 3   | <b>-549.78</b><br>(63.52) | <b>-115.51</b><br>(8.24) | <b>584.28</b><br>(60.35) | <b>-17.82</b><br>(1.22) | <b>-98.81</b><br>(12.27)  | <b>566.30</b><br>(62.55) | <b>-12.42</b><br>(0.79) | <b>-111.39</b><br>(14.22) |
| (TLR4-MD2-LPS) <sub>2</sub>        | 4   | <b>-580.18</b><br>(70.14) | <b>-112.56</b><br>(7.65) | <b>599.07</b><br>(61.85) | <b>-18.14</b><br>(0.90) | <b>-111.80</b><br>(13.94) | <b>586.04</b><br>(59.56) | <b>-12.80</b><br>(0.48) | <b>-119.49</b><br>(17.09) |
| (TLR4-MD2-LPS) <sub>2</sub>        | 1-4 | <b>-561.04</b><br>(15.54) | <b>-116.12</b><br>(3.18) | <b>588.92</b><br>(8.40)  | <b>-18.31</b><br>(0.40) | <b>-106.54</b><br>(5.70)  | <b>575.68</b><br>(10.43) | <b>-12.77</b><br>(0.28) | <b>-114.24</b><br>(3.60)  |
| (TLR4-MD2-neoseptin3) <sub>2</sub> | 1   | <b>-483.32</b><br>(43.87) | <b>-106.69</b><br>(7.47) | <b>510.33</b><br>(40.04) | <b>-16.39</b><br>(0.93) | <b>-96.06</b><br>(11.58)  | <b>491.43</b><br>(40.10) | <b>-11.62</b><br>(0.45) | <b>-110.19</b><br>(11.64) |
| (TLR4-MD2-neoseptin3) <sub>2</sub> | 2   | <b>-505.96</b><br>(55.91) | <b>-107.56</b><br>(7.17) | <b>530.87</b><br>(53.74) | <b>-16.52</b><br>(0.72) | <b>-99.15</b><br>(9.15)   | <b>513.66</b><br>(52.82) | <b>-11.70</b><br>(0.51) | <b>-111.55</b><br>(11.48) |
| (TLR4-MD2-neoseptin3) <sub>2</sub> | 3   | <b>-588.88</b><br>(62.03) | <b>-109.72</b><br>(7.24) | <b>605.98</b><br>(58.38) | <b>-17.65</b><br>(0.87) | <b>-110.24</b><br>(9.82)  | <b>589.74</b><br>(58.38) | <b>-12.53</b><br>(0.60) | <b>-121.37</b><br>(12.54) |
| (TLR4-MD2-neoseptin3) <sub>2</sub> | 4   | <b>-501.90</b><br>(50.60) | <b>-106.88</b><br>(7.35) | <b>524.92</b><br>(46.88) | <b>-16.70</b><br>(0.68) | <b>-100.54</b><br>(9.38)  | <b>511.95</b><br>(46.12) | <b>-11.66</b><br>(0.36) | <b>-108.47</b><br>(11.21) |
| (TLR4-MD2-neoseptin3) <sub>2</sub> | 1-4 | <b>-520.02</b><br>(46.96) | <b>-107.71</b><br>(1.39) | <b>543.03</b><br>(42.85) | <b>-16.82</b><br>(0.57) | <b>-101.50</b><br>(6.12)  | <b>526.70</b><br>(43.23) | <b>-11.88</b><br>(0.44) | <b>-112.90</b><br>(5.79)  |
