# Supplementary material for: Key residues in TLR4-MD2 tetramer formation identified by free energy simulations
Source: PubMed Central journal article supplement (PMC6812856; doi:10.1371/journal.pcbi.1007228), 2019-10-14
Supplement: pcbi.1007228.s014.pdf [file pcbi.1007228.s014.pdf]

**Table S4.** The binding free energies ( $\Delta G$ ) in kcal/mol computed by both molecular mechanics generalized Born surface area (MM-GBSA) and molecular mechanics Poisson-Boltzmann surface area (MM-PBSA) methods at TLR4/TLR4\* interface.

| Complex                            | #   | Generalized Born (GB)     |                          |                           |                         | Poisson-Boltzmann (PB)   |                           |                         |                          |
|------------------------------------|-----|---------------------------|--------------------------|---------------------------|-------------------------|--------------------------|---------------------------|-------------------------|--------------------------|
|                                    |     | $\Delta E_{MM}$           |                          | $\Delta G_{sol}$          |                         | $\Delta G$               | $\Delta G_{sol}$          |                         | $\Delta G$               |
|                                    |     | $\Delta E_{ele}$          | $\Delta E_{vdw}$         | $\Delta G_{pol}$          | $\Delta G_{nonpol}$     |                          | $\Delta G_{pol}$          | $\Delta G_{nonpol}$     |                          |
| (TLR4-MD2) <sub>2</sub>            | 1   | <b>-147.29</b><br>(66.89) | <b>-44.66</b><br>(5.57)  | <b>186.86</b><br>(63.12)  | <b>-8.38</b><br>(0.85)  | <b>-13.44</b><br>(8.31)  | <b>161.34</b><br>(62.61)  | <b>-7.27</b><br>(0.59)  | <b>-37.86</b><br>(11.92) |
| (TLR4-MD2) <sub>2</sub>            | 2   | <b>-78.99</b><br>(35.49)  | <b>-42.97</b><br>(8.41)  | <b>115.25</b><br>(36.00)  | <b>-7.44</b><br>(1.27)  | <b>-14.13</b><br>(6.74)  | <b>89.17</b><br>(36.79)   | <b>-6.25</b><br>(0.93)  | <b>-39.01</b><br>(9.77)  |
| (TLR4-MD2) <sub>2</sub>            | 3   | <b>-47.99</b><br>(29.34)  | <b>-31.50</b><br>(5.81)  | <b>70.24</b><br>(28.23)   | <b>-5.38</b><br>(0.62)  | <b>-14.60</b><br>(4.58)  | <b>48.45</b><br>(27.68)   | <b>-4.49</b><br>(0.48)  | <b>-35.50</b><br>(6.21)  |
| (TLR4-MD2) <sub>2</sub>            | 4   | <b>-228.82</b><br>(56.02) | <b>-50.39</b><br>(8.15)  | <b>259.70</b><br>(52.92)  | <b>-9.03</b><br>(1.32)  | <b>-28.51</b><br>(10.42) | <b>239.53</b><br>(52.13)  | <b>-7.39</b><br>(0.85)  | <b>-47.04</b><br>(13.89) |
| (TLR4-MD2) <sub>2</sub>            | 1-4 | <b>-125.77</b><br>(80.25) | <b>-42.38</b><br>(7.92)  | <b>158.01</b><br>(83.08)  | <b>-7.56</b><br>(1.59)  | <b>-17.67</b><br>(7.24)  | <b>134.62</b><br>(84.09)  | <b>-6.35</b><br>(1.34)  | <b>-39.85</b><br>(5.01)  |
| (TLR4-MD2-LPS) <sub>2</sub>        | 1   | <b>258.48</b><br>(40.74)  | <b>-66.02</b><br>(12.20) | <b>-183.62</b><br>(45.31) | <b>-8.44</b><br>(1.89)  | <b>0.41</b><br>(9.09)    | <b>-210.06</b><br>(44.72) | <b>-7.86</b><br>(1.35)  | <b>-25.45</b><br>(10.80) |
| (TLR4-MD2-LPS) <sub>2</sub>        | 2   | <b>235.55</b><br>(51.41)  | <b>-72.36</b><br>(10.04) | <b>-154.92</b><br>(52.59) | <b>-9.98</b><br>(1.50)  | <b>-1.69</b><br>(9.70)   | <b>-181.06</b><br>(51.49) | <b>-9.04</b><br>(0.97)  | <b>-26.89</b><br>(12.54) |
| (TLR4-MD2-LPS) <sub>2</sub>        | 3   | <b>251.44</b><br>(42.44)  | <b>-65.73</b><br>(9.10)  | <b>-172.15</b><br>(41.01) | <b>-8.93</b><br>(1.49)  | <b>4.64</b><br>(9.55)    | <b>-199.63</b><br>(41.30) | <b>-8.41</b><br>(0.99)  | <b>-22.31</b><br>(11.39) |
| (TLR4-MD2-LPS) <sub>2</sub>        | 4   | <b>223.79</b><br>(44.69)  | <b>-75.54</b><br>(8.99)  | <b>-142.75</b><br>(44.48) | <b>-10.26</b><br>(1.26) | <b>-4.75</b><br>(9.57)   | <b>-171.05</b><br>(43.93) | <b>-9.13</b><br>(0.84)  | <b>-31.93</b><br>(12.35) |
| (TLR4-MD2-LPS) <sub>2</sub>        | 1-4 | <b>242.32</b><br>(15.64)  | <b>-69.91</b><br>(4.84)  | <b>-163.36</b><br>(18.11) | <b>-9.40</b><br>(0.86)  | <b>-0.35</b><br>(3.94)   | <b>-190.45</b><br>(17.64) | <b>-8.61</b><br>(0.59)  | <b>-26.65</b><br>(4.01)  |
| (TLR4-MD2-neoseptin3) <sub>2</sub> | 1   | <b>276.68</b><br>(32.65)  | <b>-71.64</b><br>(6.42)  | <b>-201.17</b><br>(32.90) | <b>-8.65</b><br>(0.98)  | <b>-4.77</b><br>(6.25)   | <b>-231.08</b><br>(32.95) | <b>-7.65</b><br>(0.80)  | <b>-33.67</b><br>(7.93)  |
| (TLR4-MD2-neoseptin3) <sub>2</sub> | 2   | <b>195.57</b><br>(51.16)  | <b>-91.74</b><br>(8.11)  | <b>-108.87</b><br>(50.33) | <b>-12.63</b><br>(1.21) | <b>-17.65</b><br>(9.71)  | <b>-139.57</b><br>(50.43) | <b>-10.57</b><br>(0.77) | <b>-46.29</b><br>(12.39) |
| (TLR4-MD2-neoseptin3) <sub>2</sub> | 3   | <b>240.33</b><br>(56.26)  | <b>-80.70</b><br>(12.34) | <b>-160.99</b><br>(59.32) | <b>-10.42</b><br>(2.15) | <b>-11.77</b><br>(10.53) | <b>-190.45</b><br>(59.26) | <b>-8.92</b><br>(1.53)  | <b>-39.73</b><br>(11.59) |
| (TLR4-MD2-neoseptin3) <sub>2</sub> | 4   | <b>255.73</b><br>(45.09)  | <b>-80.25</b><br>(10.65) | <b>-173.19</b><br>(48.01) | <b>-10.23</b><br>(1.77) | <b>-7.93</b><br>(9.15)   | <b>-197.95</b><br>(47.12) | <b>-8.87</b><br>(1.35)  | <b>-31.33</b><br>(11.77) |
| (TLR4-MD2-neoseptin3) <sub>2</sub> | 1-4 | <b>242.08</b><br>(34.40)  | <b>-81.08</b><br>(8.24)  | <b>-161.06</b><br>(38.64) | <b>-10.48</b><br>(1.64) | <b>-10.53</b><br>(5.54)  | <b>-189.76</b><br>(37.83) | <b>-9.00</b><br>(1.20)  | <b>-37.76</b><br>(6.70)  |
