# Supplementary material for: Key residues in TLR4-MD2 tetramer formation identified by free energy simulations
Source: PubMed Central journal article supplement (PMC6812856; doi:10.1371/journal.pcbi.1007228), 2019-10-14
Supplement: pcbi.1007228.s015.pdf [file pcbi.1007228.s015.pdf]

**Table S5.** The binding free energies ( $\Delta G$ ) in kcal/mol computed by both molecular mechanics generalized Born surface area (MM-GBSA) and molecular mechanics Poisson-Boltzmann surface area (MM-PBSA) methods at TLR4/MD2\* interface.

| Complex                            | #   | $\Delta E_{MM}$           |                          | Generalized Born (GB)    |                         |                          | Poisson-Boltzmann (PB)   |                        | $\Delta G$               |
|------------------------------------|-----|---------------------------|--------------------------|--------------------------|-------------------------|--------------------------|--------------------------|------------------------|--------------------------|
|                                    |     | $\Delta E_{ele}$          | $\Delta E_{vdw}$         | $\Delta G_{sol}$         |                         | $\Delta G$               | $\Delta G_{sol}$         |                        |                          |
|                                    |     |                           |                          | $\Delta G_{pol}$         | $\Delta G_{nonpol}$     |                          | $\Delta G_{pol}$         | $\Delta G_{nonpol}$    |                          |
| (TLR4-MD2) <sub>2</sub>            | 1   | <b>4.47</b><br>(36.90)    | <b>-38.74</b><br>(7.28)  | <b>23.55</b><br>(33.15)  | <b>-5.00</b><br>(0.96)  | <b>-15.71</b><br>(6.82)  | <b>12.09</b><br>(34.06)  | <b>-4.81</b><br>(0.76) | <b>-26.97</b><br>(7.54)  |
| (TLR4-MD2) <sub>2</sub>            | 2   | <b>-60.50</b><br>(47.75)  | <b>-55.51</b><br>(11.58) | <b>93.04</b><br>(45.30)  | <b>-7.30</b><br>(1.68)  | <b>-30.26</b><br>(11.76) | <b>83.81</b><br>(46.33)  | <b>-6.79</b><br>(1.26) | <b>-38.97</b><br>(11.35) |
| (TLR4-MD2) <sub>2</sub>            | 3   | <b>-50.35</b><br>(39.49)  | <b>-33.67</b><br>(5.78)  | <b>70.99</b><br>(37.36)  | <b>-4.60</b><br>(0.76)  | <b>-17.61</b><br>(6.11)  | <b>57.80</b><br>(37.36)  | <b>-4.34</b><br>(0.66) | <b>-30.54</b><br>(6.78)  |
| (TLR4-MD2) <sub>2</sub>            | 4   | <b>-33.03</b><br>(50.61)  | <b>-33.99</b><br>(12.09) | <b>53.77</b><br>(51.33)  | <b>-4.83</b><br>(1.89)  | <b>-18.07</b><br>(9.88)  | <b>46.29</b><br>(53.04)  | <b>-4.39</b><br>(1.51) | <b>-25.11</b><br>(9.51)  |
| (TLR4-MD2) <sub>2</sub>            | 1-4 | <b>-34.85</b><br>(28.56)  | <b>-40.48</b><br>(10.29) | <b>60.34</b><br>(29.32)  | <b>-5.43</b><br>(1.26)  | <b>-20.41</b><br>(6.64)  | <b>50.00</b><br>(29.75)  | <b>-5.08</b><br>(1.16) | <b>-30.40</b><br>(6.14)  |
| (TLR4-MD2-LPS) <sub>2</sub>        | 1   | <b>-120.80</b><br>(34.84) | <b>-78.00</b><br>(5.40)  | <b>170.82</b><br>(33.87) | <b>-9.97</b><br>(0.90)  | <b>-37.93</b><br>(6.26)  | <b>167.08</b><br>(33.80) | <b>-8.02</b><br>(0.56) | <b>-39.71</b><br>(8.44)  |
| (TLR4-MD2-LPS) <sub>2</sub>        | 2   | <b>-142.00</b><br>(33.33) | <b>-73.00</b><br>(14.89) | <b>191.09</b><br>(35.17) | <b>-9.55</b><br>(2.01)  | <b>-33.45</b><br>(9.91)  | <b>190.02</b><br>(39.55) | <b>-7.70</b><br>(1.22) | <b>-32.67</b><br>(7.68)  |
| (TLR4-MD2-LPS) <sub>2</sub>        | 3   | <b>-264.03</b><br>(46.23) | <b>-72.56</b><br>(8.88)  | <b>288.19</b><br>(44.52) | <b>-10.42</b><br>(1.13) | <b>-58.79</b><br>(9.13)  | <b>278.58</b><br>(44.90) | <b>-8.27</b><br>(0.73) | <b>-66.25</b><br>(9.75)  |
| (TLR4-MD2-LPS) <sub>2</sub>        | 4   | <b>-142.75</b><br>(32.63) | <b>-72.84</b><br>(9.64)  | <b>185.42</b><br>(28.66) | <b>-9.85</b><br>(1.35)  | <b>-39.99</b><br>(11.06) | <b>176.64</b><br>(28.29) | <b>-7.96</b><br>(0.78) | <b>-46.87</b><br>(11.87) |
| (TLR4-MD2-LPS) <sub>2</sub>        | 1-4 | <b>-167.40</b><br>(65.22) | <b>-74.10</b><br>(2.61)  | <b>208.88</b><br>(53.56) | <b>-9.95</b><br>(0.36)  | <b>-42.54</b><br>(11.17) | <b>203.08</b><br>(51.21) | <b>-7.99</b><br>(0.23) | <b>-46.38</b><br>(14.46) |
| (TLR4-MD2-neoseptin3) <sub>2</sub> | 1   | <b>-124.29</b><br>(48.80) | <b>-78.65</b><br>(10.16) | <b>171.30</b><br>(46.78) | <b>-9.92</b><br>(1.36)  | <b>-41.55</b><br>(11.35) | <b>159.39</b><br>(47.20) | <b>-8.08</b><br>(0.79) | <b>-51.62</b><br>(12.99) |
| (TLR4-MD2-neoseptin3) <sub>2</sub> | 2   | <b>-200.25</b><br>(37.33) | <b>-76.45</b><br>(10.49) | <b>226.49</b><br>(32.29) | <b>-10.87</b><br>(1.21) | <b>-61.07</b><br>(9.63)  | <b>220.36</b><br>(31.74) | <b>-8.18</b><br>(0.63) | <b>-64.51</b><br>(11.49) |
| (TLR4-MD2-neoseptin3) <sub>2</sub> | 3   | <b>-91.52</b><br>(31.26)  | <b>-78.55</b><br>(9.09)  | <b>136.69</b><br>(30.24) | <b>-9.77</b><br>(1.10)  | <b>-43.13</b><br>(9.15)  | <b>129.17</b><br>(30.78) | <b>-7.65</b><br>(0.64) | <b>-48.55</b><br>(9.88)  |
| (TLR4-MD2-neoseptin3) <sub>2</sub> | 4   | <b>-65.26</b><br>(24.58)  | <b>-69.29</b><br>(6.16)  | <b>107.35</b><br>(23.79) | <b>-8.82</b><br>(0.80)  | <b>-36.01</b><br>(5.73)  | <b>101.86</b><br>(23.62) | <b>-7.06</b><br>(0.44) | <b>-39.73</b><br>(6.59)  |
| (TLR4-MD2-neoseptin3) <sub>2</sub> | 1-4 | <b>-120.33</b><br>(58.50) | <b>-75.74</b><br>(4.41)  | <b>160.46</b><br>(51.20) | <b>-9.85</b><br>(0.84)  | <b>-45.44</b><br>(10.86) | <b>152.70</b><br>(50.86) | <b>-7.74</b><br>(0.51) | <b>-51.10</b><br>(10.26) |
