# Supplementary material for: Key residues in TLR4-MD2 tetramer formation identified by free energy simulations
Source: PubMed Central journal article supplement (PMC6812856; doi:10.1371/journal.pcbi.1007228), 2019-10-14
Supplement: pcbi.1007228.s016.pdf [file pcbi.1007228.s016.pdf]

**Table S6.** The binding free energies ( $\Delta G$ ) in kcal/mol computed by both molecular mechanics generalized Born surface area (MM-GBSA) and molecular mechanics Poisson-Boltzmann surface area (MM-PBSA) methods at TLR4\*/MD2 interface.

| Complex                            | #   | $\Delta E_{MM}$           |                          | Generalized Born (GB)    |                         | $\Delta G$               | Poisson-Boltzmann (PB)   |                        | $\Delta G$               |
|------------------------------------|-----|---------------------------|--------------------------|--------------------------|-------------------------|--------------------------|--------------------------|------------------------|--------------------------|
|                                    |     | $\Delta E_{ele}$          | $\Delta E_{vdw}$         | $\Delta G_{sol}$         |                         |                          | $\Delta G_{sol}$         |                        |                          |
|                                    |     |                           |                          | $\Delta G_{pol}$         | $\Delta G_{nonpol}$     | $\Delta G_{pol}$         | $\Delta G_{nonpol}$      |                        |                          |
| (TLR4-MD2) <sub>2</sub>            | 1   | <b>-130.70</b><br>(35.33) | <b>-54.16</b><br>(8.46)  | <b>163.46</b><br>(33.19) | <b>-7.49</b><br>(1.25)  | <b>-28.87</b><br>(7.62)  | <b>153.52</b><br>(34.08) | <b>-6.99</b><br>(1.03) | <b>-38.30</b><br>(8.24)  |
| (TLR4-MD2) <sub>2</sub>            | 2   | <b>-127.25</b><br>(48.76) | <b>-62.64</b><br>(8.92)  | <b>167.76</b><br>(44.97) | <b>-8.43</b><br>(1.19)  | <b>-32.20</b><br>(8.54)  | <b>157.69</b><br>(45.50) | <b>-7.54</b><br>(0.72) | <b>-39.72</b><br>(8.53)  |
| (TLR4-MD2) <sub>2</sub>            | 3   | <b>-111.24</b><br>(45.27) | <b>-38.96</b><br>(8.76)  | <b>139.91</b><br>(42.32) | <b>-5.43</b><br>(1.21)  | <b>-17.19</b><br>(7.98)  | <b>127.33</b><br>(42.98) | <b>-5.15</b><br>(0.94) | <b>-28.00</b><br>(7.96)  |
| (TLR4-MD2) <sub>2</sub>            | 4   | <b>-100.08</b><br>(41.04) | <b>-53.78</b><br>(6.19)  | <b>136.76</b><br>(39.61) | <b>-6.84</b><br>(0.89)  | <b>-24.99</b><br>(7.11)  | <b>124.68</b><br>(39.91) | <b>-6.09</b><br>(0.65) | <b>-35.25</b><br>(8.10)  |
| (TLR4-MD2) <sub>2</sub>            | 1-4 | <b>-117.32</b><br>(14.28) | <b>-52.39</b><br>(9.84)  | <b>152.39</b><br>(16.31) | <b>-7.05</b><br>(1.26)  | <b>-24.35</b><br>(6.36)  | <b>140.81</b><br>(17.21) | <b>-6.44</b><br>(1.05) | <b>-35.32</b><br>(5.22)  |
| (TLR4-MD2-LPS) <sub>2</sub>        | 1   | <b>-129.04</b><br>(31.58) | <b>-75.38</b><br>(5.50)  | <b>178.29</b><br>(28.47) | <b>-9.63</b><br>(0.69)  | <b>-35.75</b><br>(7.07)  | <b>176.32</b><br>(28.86) | <b>-7.67</b><br>(0.35) | <b>-35.75</b><br>(8.85)  |
| (TLR4-MD2-LPS) <sub>2</sub>        | 2   | <b>-139.08</b><br>(34.71) | <b>-71.20</b><br>(9.83)  | <b>182.33</b><br>(33.32) | <b>-9.38</b><br>(1.27)  | <b>-37.31</b><br>(9.05)  | <b>175.18</b><br>(35.11) | <b>-7.63</b><br>(0.65) | <b>-42.72</b><br>(9.20)  |
| (TLR4-MD2-LPS) <sub>2</sub>        | 3   | <b>-153.29</b><br>(29.62) | <b>-67.98</b><br>(7.26)  | <b>190.72</b><br>(27.97) | <b>-8.68</b><br>(0.98)  | <b>-39.21</b><br>(7.73)  | <b>180.47</b><br>(28.02) | <b>-7.33</b><br>(0.58) | <b>-48.11</b><br>(9.86)  |
| (TLR4-MD2-LPS) <sub>2</sub>        | 4   | <b>-274.18</b><br>(38.48) | <b>-78.52</b><br>(6.15)  | <b>296.96</b><br>(36.13) | <b>-11.37</b><br>(0.81) | <b>-67.10</b><br>(8.50)  | <b>285.85</b><br>(35.75) | <b>-8.82</b><br>(0.46) | <b>-75.67</b><br>(9.53)  |
| (TLR4-MD2-LPS) <sub>2</sub>        | 1-4 | <b>-173.90</b><br>(67.59) | <b>-73.27</b><br>(4.63)  | <b>212.96</b><br>(55.82) | <b>-9.77</b><br>(1.14)  | <b>-43.96</b><br>(15.91) | <b>204.46</b><br>(54.31) | <b>-7.86</b><br>(0.66) | <b>-50.56</b><br>(17.49) |
| (TLR4-MD2-neoseptin3) <sub>2</sub> | 1   | <b>-222.52</b><br>(39.26) | <b>-64.87</b><br>(6.93)  | <b>247.09</b><br>(36.88) | <b>-8.95</b><br>(0.97)  | <b>-49.23</b><br>(8.11)  | <b>235.26</b><br>(36.46) | <b>-7.40</b><br>(0.71) | <b>-59.52</b><br>(10.39) |
| (TLR4-MD2-neoseptin3) <sub>2</sub> | 2   | <b>-141.81</b><br>(53.77) | <b>-75.63</b><br>(11.47) | <b>184.43</b><br>(51.58) | <b>-9.65</b><br>(1.46)  | <b>-42.65</b><br>(9.88)  | <b>173.19</b><br>(51.80) | <b>-7.53</b><br>(0.85) | <b>-51.76</b><br>(10.03) |
| (TLR4-MD2-neoseptin3) <sub>2</sub> | 3   | <b>-167.54</b><br>(40.85) | <b>-86.27</b><br>(6.39)  | <b>211.26</b><br>(37.31) | <b>-11.45</b><br>(0.91) | <b>-53.98</b><br>(8.81)  | <b>201.89</b><br>(38.00) | <b>-8.81</b><br>(0.50) | <b>-60.72</b><br>(10.40) |
| (TLR4-MD2-neoseptin3) <sub>2</sub> | 4   | <b>-170.39</b><br>(55.75) | <b>-83.52</b><br>(12.27) | <b>214.76</b><br>(51.70) | <b>-11.14</b><br>(1.46) | <b>-50.27</b><br>(12.88) | <b>204.62</b><br>(50.67) | <b>-8.49</b><br>(0.71) | <b>-57.77</b><br>(11.57) |
| (TLR4-MD2-neoseptin3) <sub>2</sub> | 1-4 | <b>-175.57</b><br>(33.84) | <b>-77.57</b><br>(9.59)  | <b>215.18</b><br>(25.08) | <b>-10.30</b><br>(1.19) | <b>-48.24</b><br>(5.13)  | <b>203.74</b><br>(25.37) | <b>-8.06</b><br>(0.70) | <b>-57.44</b><br>(3.98)  |
