# Supplementary material for: Key residues in TLR4-MD2 tetramer formation identified by free energy simulations
Source: PubMed Central journal article supplement (PMC6812856; doi:10.1371/journal.pcbi.1007228), 2019-10-14
Supplement: pcbi.1007228.s017.pdf [file pcbi.1007228.s017.pdf]

**Table S7. The binding free energies ( $\Delta G$ ) in kcal/mol at (TLR4-MD2)/(TLR4\*-MD2\*) interface computed by both molecular mechanics generalized Born surface area (MM-GBSA) and molecular mechanics Poisson-Boltzmann surface area (MM-PBSA) methods.** The free energies in each trajectory of the ligand-free (TLR4-MD2)<sub>2</sub> tetramer, lipopolysaccharide (LPS)-bound (TLR4-MD2)<sub>2</sub> tetramer, and neoseptin3-bound (TLR4-MD2)<sub>2</sub> tetramer complexes are averaged over the 1000 frames from the last 1.0  $\mu$ s of that trajectory with an interval of 1.0 ns. Trajectories in each complex are identified with a number from 1 to 4 (#) and their average is denoted by '1-4' as shaded in light grey. A negative value is a favorable free energy, while a positive value is an unfavorable. The values in parenthesis are standard deviation.  $\Delta E_{MM}$  is molecular mechanics free energy which is divided into  $\Delta E_{ele}$  and  $\Delta E_{vdw}$  representing the contributions from the electrostatic and van der Waals interactions, respectively.  $\Delta G_{sol}$  is solvation free energy expressed by  $\Delta G_{pol}$  and  $\Delta G_{nonpol}$ , the polar and non-polar contributions, respectively.

| Complex                            | #   | $\Delta E_{MM}$           |                           |                          |                         | Generalized Born (GB)     |                          | Poisson-Boltzmann (PB)  |                           | $\Delta G$ |
|------------------------------------|-----|---------------------------|---------------------------|--------------------------|-------------------------|---------------------------|--------------------------|-------------------------|---------------------------|------------|
|                                    |     | $\Delta E_{MM}$           |                           | $\Delta G_{sol}$         |                         | $\Delta G$                | $\Delta G_{sol}$         |                         |                           |            |
|                                    |     | $\Delta E_{ele}$          | $\Delta E_{vdw}$          | $\Delta G_{pol}$         | $\Delta G_{nonpol}$     |                           | $\Delta G_{pol}$         | $\Delta G_{nonpol}$     |                           |            |
| (TLR4-MD2) <sub>2</sub>            | 1   | <b>-275.67</b><br>(87.78) | <b>-137.58</b><br>(13.02) | <b>375.87</b><br>(82.49) | <b>-20.87</b><br>(1.87) | <b>-58.23</b><br>(12.75)  | <b>329.77</b><br>(83.66) | <b>-19.08</b><br>(1.46) | <b>-102.53</b><br>(15.47) |            |
| (TLR4-MD2) <sub>2</sub>            | 2   | <b>-266.19</b><br>(66.36) | <b>-161.13</b><br>(16.63) | <b>373.78</b><br>(63.72) | <b>-23.18</b><br>(2.19) | <b>-76.69</b><br>(16.56)  | <b>331.21</b><br>(64.32) | <b>-20.58</b><br>(1.59) | <b>-116.66</b><br>(18.43) |            |
| (TLR4-MD2) <sub>2</sub>            | 3   | <b>-210.04</b><br>(67.62) | <b>-104.15</b><br>(12.85) | <b>280.08</b><br>(62.66) | <b>-15.41</b><br>(1.53) | <b>-49.49</b><br>(10.95)  | <b>234.22</b><br>(62.54) | <b>-13.98</b><br>(1.22) | <b>-93.93</b><br>(12.46)  |            |
| (TLR4-MD2) <sub>2</sub>            | 4   | <b>-363.99</b><br>(80.16) | <b>-138.18</b><br>(16.62) | <b>451.11</b><br>(80.24) | <b>-20.70</b><br>(2.63) | <b>-71.74</b><br>(15.23)  | <b>413.22</b><br>(80.41) | <b>-17.87</b><br>(2.02) | <b>-106.81</b><br>(18.80) |            |
| (TLR4-MD2) <sub>2</sub>            | 1-4 | <b>-278.97</b><br>(63.65) | <b>-135.26</b><br>(23.46) | <b>370.21</b><br>(70.03) | <b>-20.04</b><br>(3.29) | <b>-64.04</b><br>(12.45)  | <b>327.11</b><br>(73.18) | <b>-17.88</b><br>(2.82) | <b>-104.98</b><br>(9.45)  |            |
| (TLR4-MD2-LPS) <sub>2</sub>        | 1   | <b>10.39</b><br>(65.89)   | <b>-219.44</b><br>(13.95) | <b>161.32</b><br>(65.97) | <b>-28.00</b><br>(2.15) | <b>-75.70</b><br>(13.19)  | <b>132.10</b><br>(64.93) | <b>-23.33</b><br>(1.44) | <b>-100.26</b><br>(17.71) |            |
| (TLR4-MD2-LPS) <sub>2</sub>        | 2   | <b>-42.30</b><br>(66.60)  | <b>-216.60</b><br>(15.04) | <b>213.07</b><br>(65.54) | <b>-28.87</b><br>(2.24) | <b>-74.69</b><br>(14.94)  | <b>180.66</b><br>(66.48) | <b>-24.18</b><br>(1.35) | <b>-102.41</b><br>(17.18) |            |
| (TLR4-MD2-LPS) <sub>2</sub>        | 3   | <b>-162.23</b><br>(76.06) | <b>-206.31</b><br>(13.59) | <b>300.12</b><br>(72.08) | <b>-27.99</b><br>(1.86) | <b>-96.38</b><br>(15.33)  | <b>256.23</b><br>(72.21) | <b>-23.78</b><br>(1.14) | <b>-136.06</b><br>(18.09) |            |
| (TLR4-MD2-LPS) <sub>2</sub>        | 4   | <b>-191.27</b><br>(61.00) | <b>-226.94</b><br>(15.91) | <b>333.83</b><br>(58.23) | <b>-31.37</b><br>(2.25) | <b>-115.73</b><br>(17.74) | <b>289.68</b><br>(57.84) | <b>-25.63</b><br>(1.43) | <b>-154.13</b><br>(19.93) |            |
| (TLR4-MD2-LPS) <sub>2</sub>        | 1-4 | <b>-96.35</b><br>(96.03)  | <b>-217.32</b><br>(8.54)  | <b>252.09</b><br>(79.06) | <b>-29.06</b><br>(1.60) | <b>-90.63</b><br>(19.49)  | <b>214.67</b><br>(71.48) | <b>-24.23</b><br>(1.00) | <b>-123.22</b><br>(26.33) |            |
| (TLR4-MD2-neoseptin3) <sub>2</sub> | 1   | <b>-62.70</b><br>(68.23)  | <b>-215.18</b><br>(14.21) | <b>208.91</b><br>(65.78) | <b>-27.52</b><br>(2.03) | <b>-96.47</b><br>(16.15)  | <b>156.79</b><br>(65.90) | <b>-23.13</b><br>(1.40) | <b>-144.20</b><br>(18.90) |            |
| (TLR4-MD2-neoseptin3) <sub>2</sub> | 2   | <b>-132.96</b><br>(87.76) | <b>-243.85</b><br>(17.00) | <b>287.41</b><br>(84.77) | <b>-33.16</b><br>(2.35) | <b>-122.54</b><br>(18.54) | <b>241.70</b><br>(86.50) | <b>-26.28</b><br>(1.24) | <b>-161.37</b><br>(20.97) |            |
| (TLR4-MD2-neoseptin3) <sub>2</sub> | 3   | <b>-9.33</b><br>(51.50)   | <b>-245.55</b><br>(12.83) | <b>176.50</b><br>(75.18) | <b>-31.62</b><br>(2.05) | <b>-109.99</b><br>(14.73) | <b>131.95</b><br>(75.23) | <b>-25.30</b><br>(1.37) | <b>-148.21</b><br>(17.26) |            |
| (TLR4-MD2-neoseptin3) <sub>2</sub> | 4   | <b>31.28</b><br>(84.48)   | <b>-233.09</b><br>(14.66) | <b>136.04</b><br>(83.64) | <b>-30.19</b><br>(2.24) | <b>-95.94</b><br>(16.85)  | <b>98.25</b><br>(81.98)  | <b>-24.42</b><br>(1.51) | <b>-127.97</b><br>(17.76) |            |
| (TLR4-MD2-neoseptin3) <sub>2</sub> | 1-4 | <b>-43.43</b><br>(71.02)  | <b>-234.42</b><br>(13.96) | <b>202.22</b><br>(64.14) | <b>-30.62</b><br>(2.40) | <b>-106.24</b><br>(12.67) | <b>157.17</b><br>(61.25) | <b>-24.78</b><br>(1.34) | <b>-145.44</b><br>(13.76) |            |
