# Supplementary material for: Key residues in TLR4-MD2 tetramer formation identified by free energy simulations
Source: PubMed Central journal article supplement (PMC6812856; doi:10.1371/journal.pcbi.1007228), 2019-10-14
Supplement: pcbi.1007228.s018.pdf [file pcbi.1007228.s018.pdf]

**Table S8. The key residues of TLR4 and MD2 identified by per-residue free energy decomposition (kcal/mol) in the TLR4/MD2 and TLR4\*/MD2\* interfaces of ligand-free TLR4-MD2 heterodimer, (TLR4-MD2)<sub>2</sub> tetramer, lipopolysaccharide (LPS)-bound (TLR4-MD2)<sub>2</sub> tetramer, and neoseptin3-bound (TLR4-MD2)<sub>2</sub> tetramer complexes. The values are averaged over the 1000 frames of the combined 4 trajectories of each system. A negative value is a favorable free energy, while a positive value is an unfavorable. The shaded entries are those that have unfavorable free energy contribution of 2.0 kcal/mol or greater.**

|         |            | Complex   |                         |            |                             |            |                                    |            |
|---------|------------|-----------|-------------------------|------------|-----------------------------|------------|------------------------------------|------------|
|         |            | TLR4-MD2  | (TLR4-MD2) <sub>2</sub> |            | (TLR4-MD2-LPS) <sub>2</sub> |            | (TLR4-MD2-neoseptin3) <sub>2</sub> |            |
|         |            | Interface |                         |            |                             |            |                                    |            |
| Monomer | Residue    | TLR4/MD2  | TLR4/MD2                | TLR4*/MD2* | TLR4/MD2                    | TLR4*/MD2* | TLR4/MD2                           | TLR4*/MD2* |
| TLR4    | D59        | -3.924    | -3.895                  | -3.536     | -3.458                      | -3.563     | -3.765                             | -3.525     |
|         | F62        | -2.523    | -3.125                  | -2.758     | -2.530                      | -2.729     | -2.603                             | -2.482     |
|         | R86        | -3.067    | -3.335                  | -4.060     | -3.726                      | -3.388     | -4.115                             | -4.154     |
|         | T109       | -1.525    | -1.837                  | -1.687     | -2.152                      | -2.157     | -2.272                             | -2.151     |
|         | H158       | -0.802    | -0.768                  | -0.640     | -1.522                      | -2.256     | -1.887                             | -2.151     |
|         | R233       | -3.742    | -4.247                  | -3.283     | -3.211                      | -3.923     | -3.424                             | -2.239     |
|         | F262       | -4.369    | -4.319                  | -4.272     | -4.418                      | -4.149     | -4.099                             | -4.566     |
|         | K263       | -3.325    | -3.277                  | -3.629     | -1.428                      | -0.936     | -2.875                             | -3.006     |
|         | R288       | -5.006    | -6.375                  | -4.468     | -7.146                      | -7.472     | -5.757                             | -5.195     |
|         | Y291       | -2.020    | -2.039                  | -2.050     | -2.156                      | -2.117     | -2.270                             | -2.045     |
|         | R337       | -12.805   | -12.111                 | -9.887     | -12.621                     | -12.242    | -11.137                            | -11.109    |
|         | E134       | 2.291     | 2.241                   | 1.525      | 1.593                       | 0.815      | 1.509                              | 0.983      |
|         | D264       | 2.686     | 3.226                   | 2.556      | 5.978                       | 3.451      | 3.598                              | 1.764      |
| E265    | 2.508      | 1.370     | 1.048                   | 2.440      | 2.582                       | 1.968      | 1.810                              |            |
| MD2     | R68        | -2.493    | -4.013                  | -1.656     | -2.151                      | -3.334     | -2.269                             | -1.773     |
|         | Y102       | -4.731    | -5.158                  | -4.852     | -4.810                      | -4.471     | -5.089                             | -4.661     |
|         | S103       | -7.998    | -7.953                  | -7.472     | -8.215                      | -8.549     | -7.944                             | -7.591     |
|         | F104       | -2.610    | -2.603                  | -2.301     | -2.897                      | -2.235     | -2.814                             | -2.704     |
|         | R106       | -7.266    | -7.521                  | -6.494     | -7.638                      | -6.759     | -6.926                             | -8.389     |
|         | L108       | -2.065    | -2.166                  | -2.371     | -2.526                      | -2.536     | -2.420                             | -2.629     |
|         | K109       | -5.667    | -5.564                  | -6.137     | -5.775                      | -5.724     | -6.053                             | -5.939     |
|         | G110       | -2.583    | -2.663                  | -1.214     | -3.580                      | -3.587     | -2.364                             | -2.790     |
|         | T112       | -2.602    | -3.099                  | -2.314     | -4.966                      | -4.667     | -4.918                             | -5.084     |
|         | T115       | -3.435    | -1.679                  | -0.300     | -0.998                      | -2.708     | -1.463                             | -2.578     |
|         | D99        | 4.151     | 4.323                   | 3.761      | 4.997                       | 5.772      | 4.018                              | 2.554      |
|         | D101       | 2.336     | 2.006                   | 2.299      | 2.077                       | 1.413      | 1.700                              | 2.142      |
| E111    | 3.888      | 4.489     | 1.836                   | 5.074      | 2.325                       | 4.511      | 4.183                              |            |
| Ligand  | LPS        | –         | –                       | –          | -4.75                       | -4.90      | –                                  | –          |
|         | neoseptin3 | –         | –                       | –          | –                           | –          | -4.86                              | -4.47      |
