# Supplementary material for: Key residues in TLR4-MD2 tetramer formation identified by free energy simulations
Source: PubMed Central journal article supplement (PMC6812856; doi:10.1371/journal.pcbi.1007228), 2019-10-14
Supplement: pcbi.1007228.s019.pdf [file pcbi.1007228.s019.pdf]

**Table S9. The key residues of TLR4 and TLR4\* identified by per-residue free energy decomposition (kcal/mol) in the TLR4/TLR4\* interface of ligand-free (TLR4-MD2)<sub>2</sub> tetramer, lipopolysaccharide (LPS)-bound (TLR4-MD2-LPS)<sub>2</sub> tetramer, and neoseptin3-bound (TLR4-MD2-neoseptin3)<sub>2</sub> tetramer complexes. The values are averaged over the 1000 frames of the combined 4 trajectories of each system. A negative value is a favorable free energy, while a positive value is an unfavorable. The shaded entries are those that have unfavorable free energy contribution of 2.0 kcal/mol or greater.**

|                |                | <b>Complex</b>              |                             |                                    |
|----------------|----------------|-----------------------------|-----------------------------|------------------------------------|
|                |                | (TLR4-MD2) <sub>2</sub>     | (TLR4-MD2-LPS) <sub>2</sub> | (TLR4-MD2-neoseptin3) <sub>2</sub> |
| <b>Monomer</b> | <b>Residue</b> | <b>TLR4/TLR4* Interface</b> |                             |                                    |
| TLR4           | S364           | -0.034                      | -1.206                      | -1.322                             |
|                | A409           | -0.324                      | -1.309                      | -2.113                             |
|                | K433           | -6.737                      | 3.183                       | 0.885                              |
|                | R434           | -2.979                      | -0.282                      | -0.244                             |
|                | E507           | 0.444                       | 2.684                       | 1.154                              |
| TLR4*          | S364           | -0.026                      | -1.221                      | -2.314                             |
|                | A409           | -0.247                      | -1.324                      | -1.673                             |
|                | K433           | -4.672                      | 2.538                       | 2.376                              |
|                | R434           | -6.015                      | -0.293                      | -0.242                             |
|                | E507           | 0.386                       | 2.548                       | 1.647                              |
