# Supplementary material for: Key residues in TLR4-MD2 tetramer formation identified by free energy simulations
Source: PubMed Central journal article supplement (PMC6812856; doi:10.1371/journal.pcbi.1007228), 2019-10-14
Supplement: pcbi.1007228.s020.pdf [file pcbi.1007228.s020.pdf]

**Table S10. The binding free energies ( $\Delta G$ ) in kcal/mol between either MD2 or MD2\* monomer and the ligands (either LPS or neoseptin3) at either the MD2/ligand or MD2\*/ligand interface computed by both molecular mechanics generalized Born surface area (MM-GBSA) and molecular mechanics Poisson-Boltzmann surface area (MM-PBSA) methods. The free energies in each of the lipopolysaccharide (LPS)-bound (TLR4-MD2)<sub>2</sub> tetramer and neoseptin3-bound (TLR4-MD2)<sub>2</sub> tetramer complexes are averaged over the 1000 frames of the combined 4 trajectories. A negative value is a favorable free energy, while a positive value is an unfavorable. The values in parenthesis are standard deviation.  $\Delta E_{MM}$  is molecular mechanics free energy which is divided into  $\Delta E_{ele}$  and  $\Delta E_{vdw}$  representing the contributions from the electrostatic and van der Waals interactions, respectively.  $\Delta G_{sol}$  is solvation free energy expressed by  $\Delta G_{pol}$  and  $\Delta G_{nonpol}$ , the polar and non-polar contributions, respectively.**

| Monomer     | Complex                      | #   | Generalized Born (GB)    |                           |                         |                         | Poisson-Boltzmann (PB)   |                         |                         |                          |
|-------------|------------------------------|-----|--------------------------|---------------------------|-------------------------|-------------------------|--------------------------|-------------------------|-------------------------|--------------------------|
|             |                              |     | $\Delta E_{MM}$          |                           | $\Delta G_{sol}$        |                         | $\Delta G$               | $\Delta G_{sol}$        |                         | $\Delta G$               |
|             |                              |     | $\Delta E_{ele}$         | $\Delta E_{vdw}$          | $\Delta G_{pol}$        | $\Delta G_{nonpol}$     |                          | $\Delta G_{pol}$        | $\Delta G_{nonpol}$     |                          |
| <b>MD2</b>  | (TLR4-MD2-LPS) <sub>2</sub>  | 1-4 | <b>-14.50</b><br>(17.25) | <b>-124.26</b><br>(8.52)  | <b>47.96</b><br>(13.53) | <b>-17.55</b><br>(1.16) | <b>-108.35</b><br>(9.58) | <b>50.27</b><br>(14.60) | <b>-11.88</b><br>(0.58) | <b>-100.36</b><br>(9.40) |
| <b>MD2</b>  | (TLR4-MD2-nst3) <sub>2</sub> | 1-4 | <b>-18.81</b><br>(12.94) | <b>-76.25</b><br>(7.61)   | <b>47.81</b><br>(11.63) | <b>-10.48</b><br>(1.16) | <b>-57.72</b><br>(8.24)  | <b>50.05</b><br>(12.60) | <b>-8.00</b><br>(0.55)  | <b>-53.01</b><br>(8.10)  |
| <b>MD2*</b> | (TLR4-MD2-LPS) <sub>2</sub>  | 1-4 | <b>-28.93</b><br>(22.84) | <b>-128.43</b><br>(10.96) | <b>59.27</b><br>(15.47) | <b>-18.10</b><br>(1.32) | <b>-116.18</b><br>(9.54) | <b>61.43</b><br>(15.78) | <b>-12.10</b><br>(0.54) | <b>-108.02</b><br>(8.76) |
| <b>MD2*</b> | (TLR4-MD2-nst3) <sub>2</sub> | 1-4 | <b>-11.27</b><br>(13.06) | <b>-65.14</b><br>(12.60)  | <b>38.06</b><br>(12.75) | <b>-8.86</b><br>(1.63)  | <b>-47.22</b><br>(10.72) | <b>39.89</b><br>(14.21) | <b>-7.07</b><br>(1.02)  | <b>-43.59</b><br>(9.92)  |
